# Supplementary material
Source: PubMed Central journal article supplement (PMC3686137)

**SUPPORTING INFORMATION**

**DOI:** 10.1002/ejoc.201101063

**Title:** Convenient Synthesis and Evaluation of a Heptadentate Bifunctional Ligand for Radioimmunotherapy Applications

**Author(s):** Hyun-Soon Chong,\* Xiang Sun, Pengfei Dong, Chi Soo Kang

# 1. ITLC and HPLC spectra for radiolabeling kinetics studies

## A. Radiolabeling of C-NE3TA-Trastuzumab with $^{90}\text{Y}$

### Sample 1

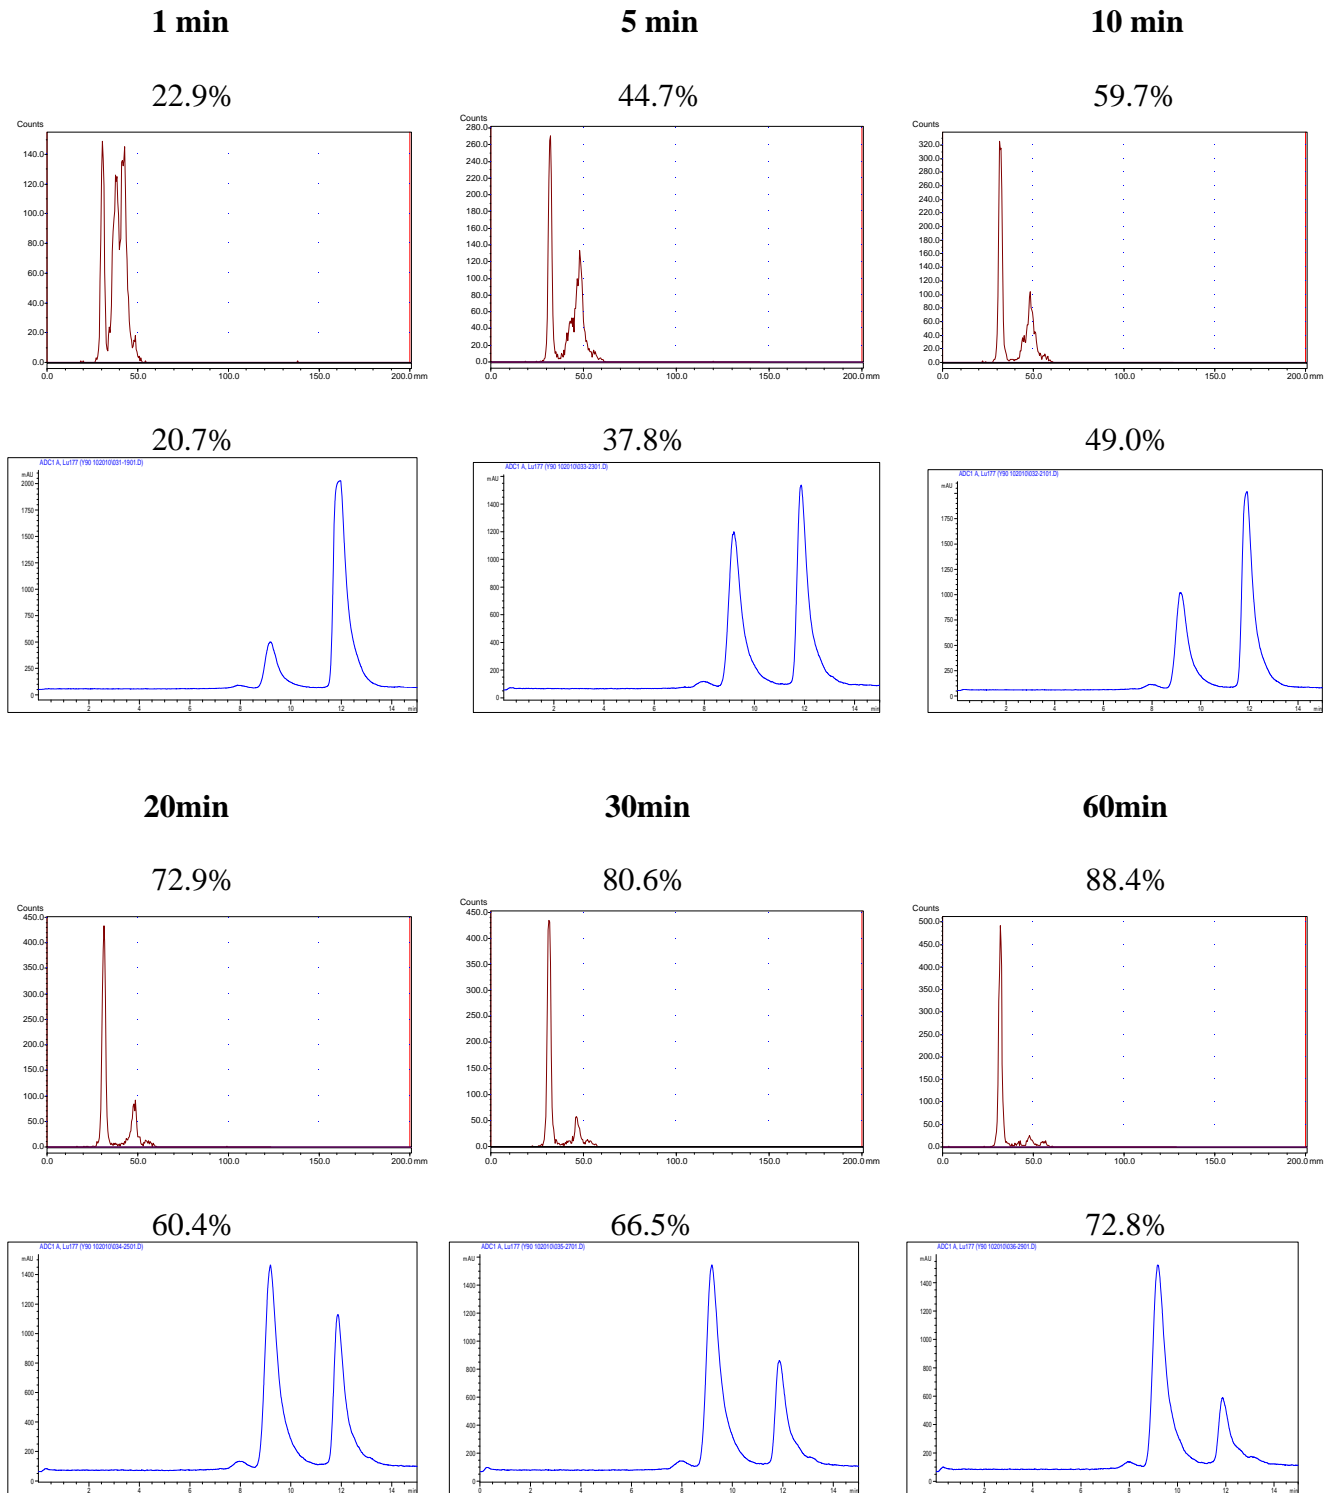

# Sample 2

**1 min**

26.2%

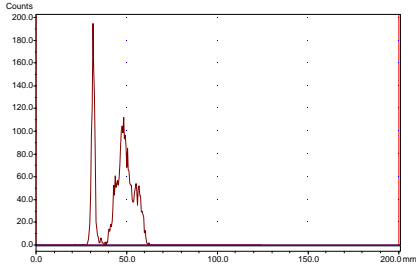

**5 min**

44.5%

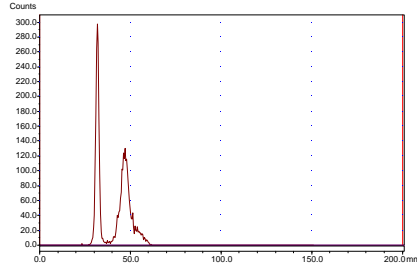

**10 min**

59.8%

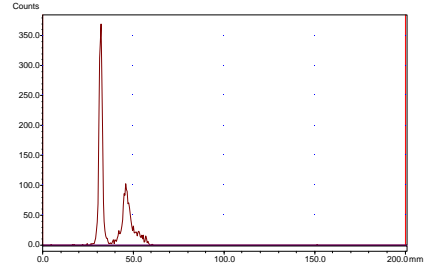

23.7%

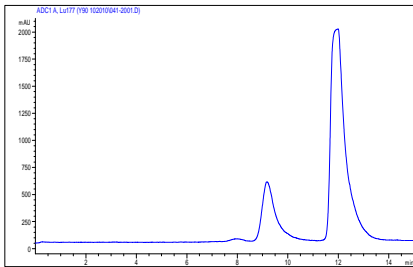

36.9%

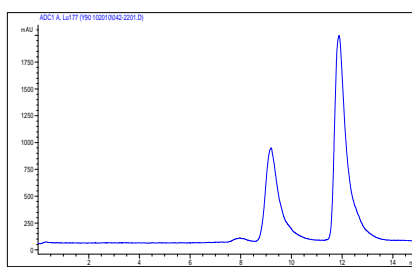

48.9%

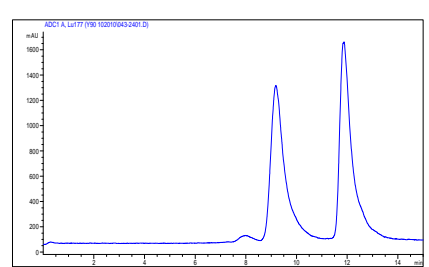

**20 min**

72.1%

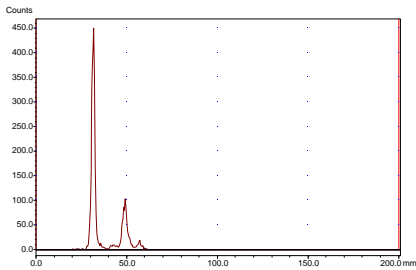

**30 min**

80.7%

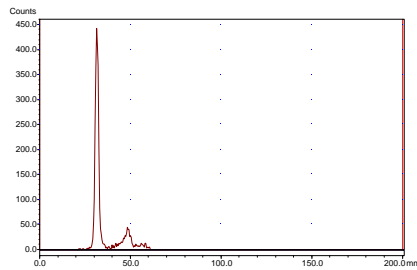

**60 min**

87.4%

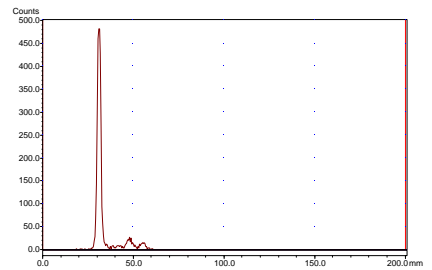

61.5%

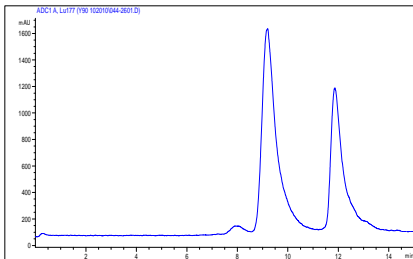

66.9%

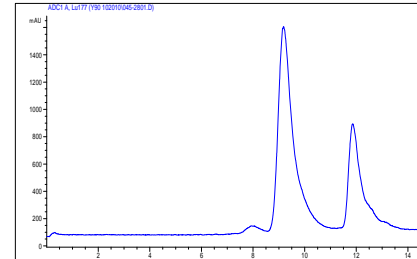

72.5%

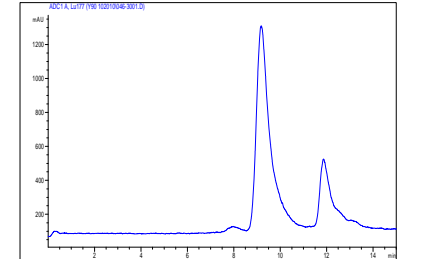

# Sample 3

**1 min**

20.9%

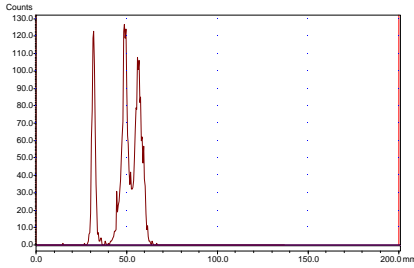

**5 min**

50.6%

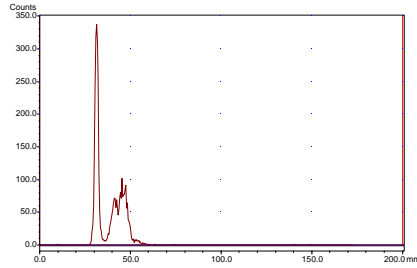

**10 min**

60.9%

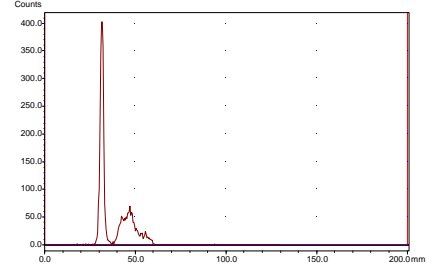

24.5%

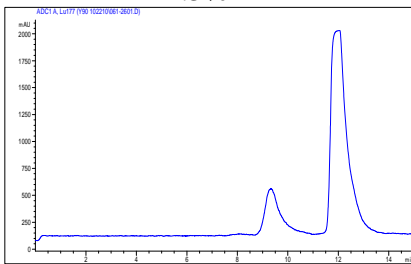

43.2%

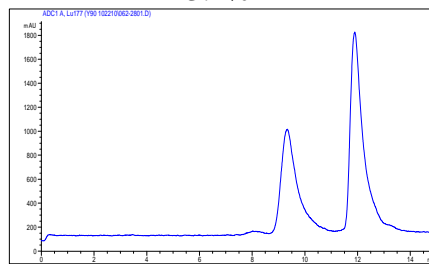

51.9%

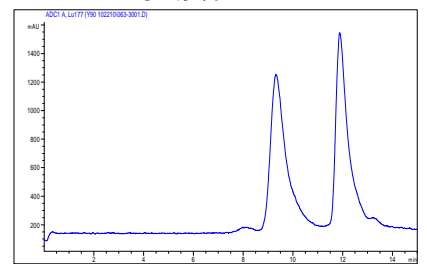

**20 min**

76.9%

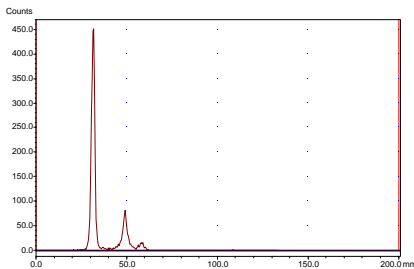

**30 min**

83.4%

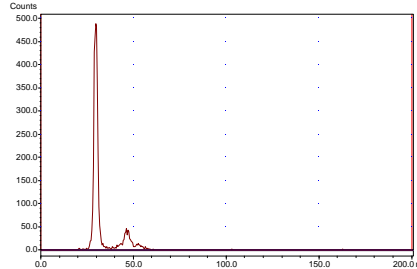

**60 min**

90.8%

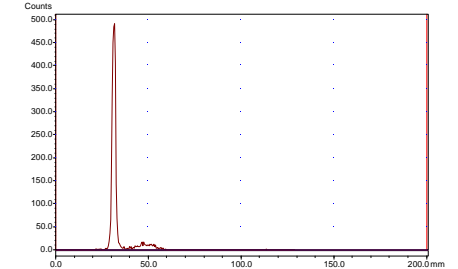

63.5%

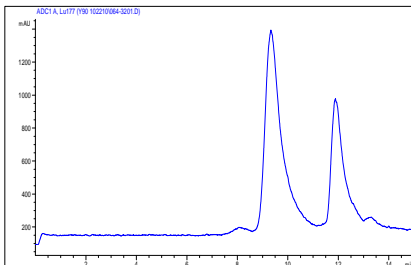

64.8%

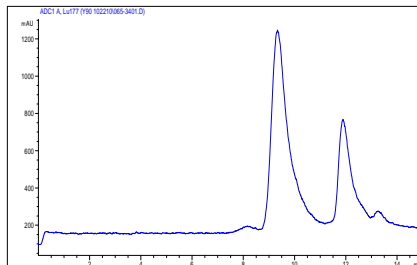

70.4%

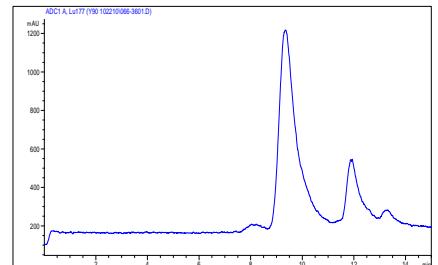

## B. Radiolabeling of C-NE3TA-Trastuzumab with $^{177}\text{Lu}$

### Sample 1

**1 min**

14.2%

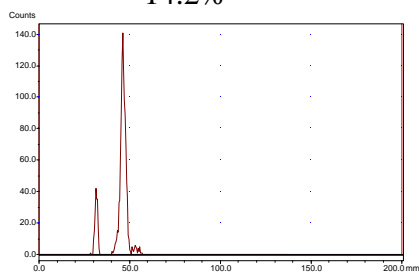

**5 min**

22.4%

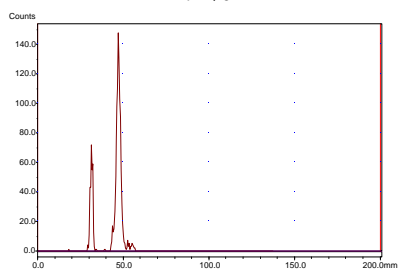

**10 min**

26.2%

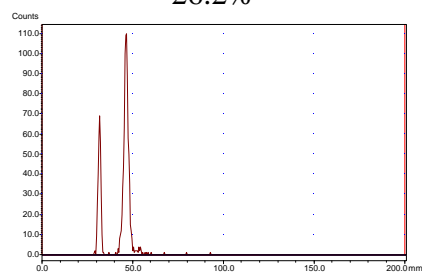

10.5%

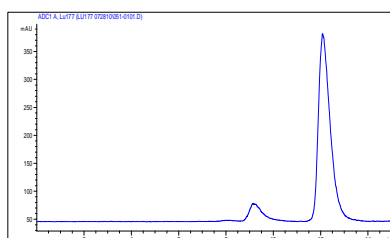

18.1%

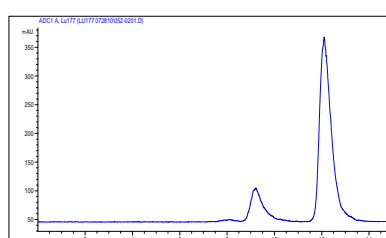

21.8%

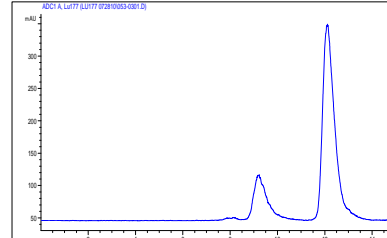

**20 min**

33.3%

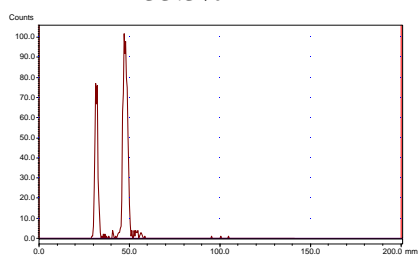

**30 min**

32.9%

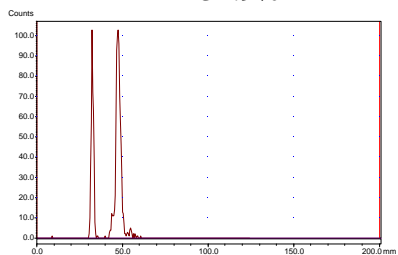

**60 min**

35.9%

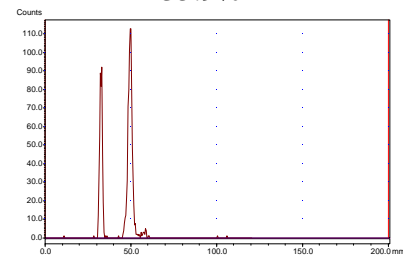

23.9%

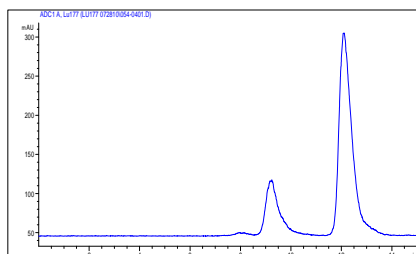

25.6%

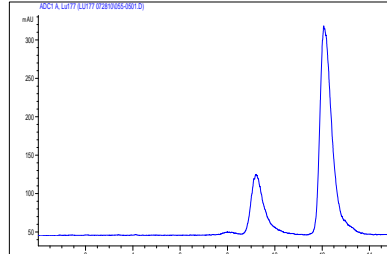

29.1%

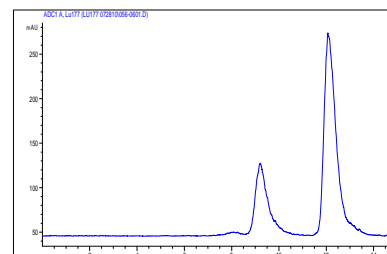

# Sample 2

**1 min**

**13.5%**

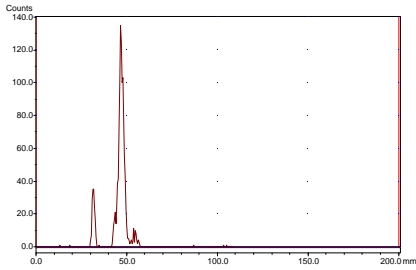

**5 min**

**21.3%**

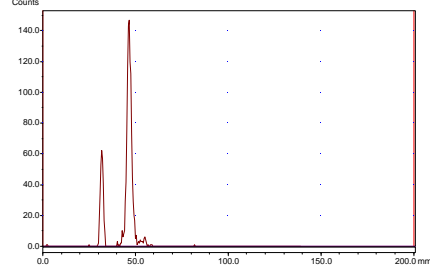

**10 min**

**27.0%**

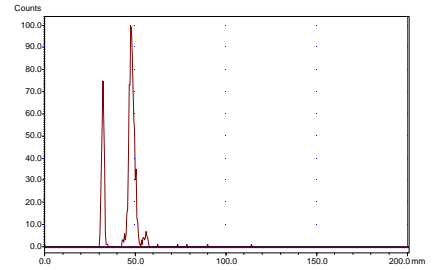

**11.3%**

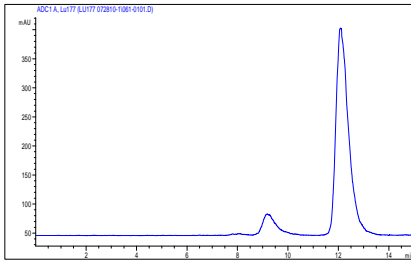

**18.2%**

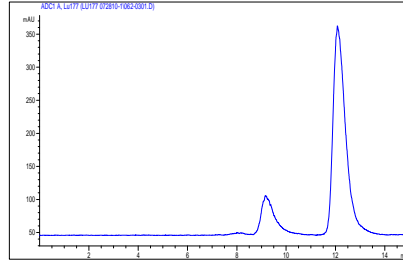

**21.5%**

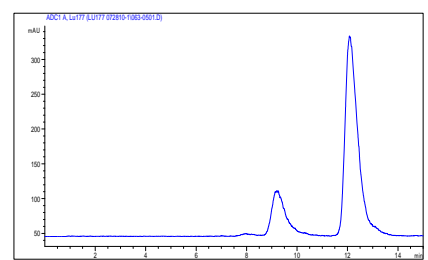

**20 min**

**32.2%**

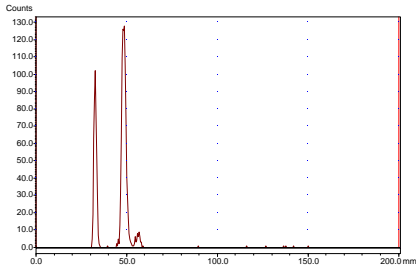

**30 min**

**35.5%**

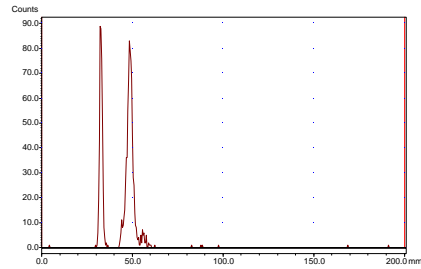

**60 min**

**38.8%**

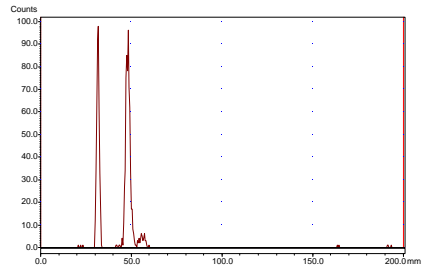

**25.1%**

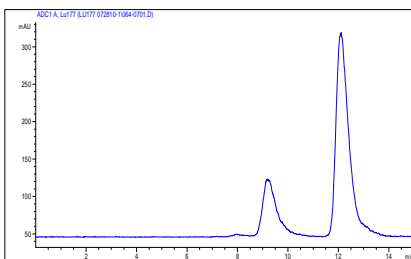

**26.3%**

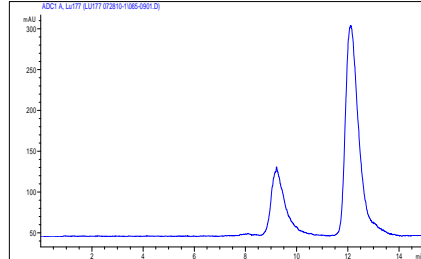

**29.1%**

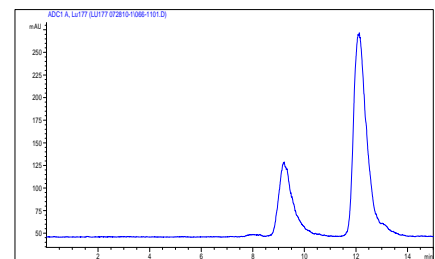

# Sample 3

**1 min**

12.8%

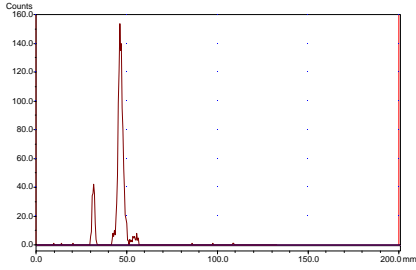

**5 min**

21.6%

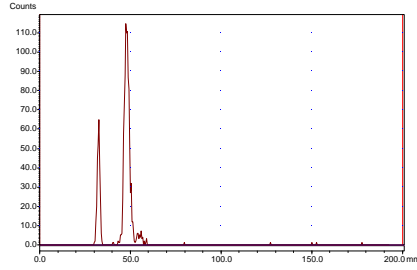

**10 min**

27.1%

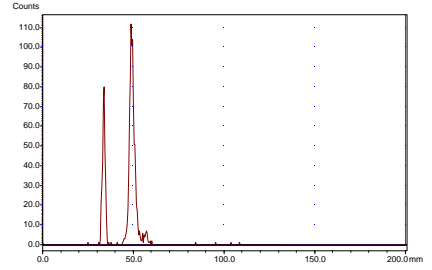

9.8%

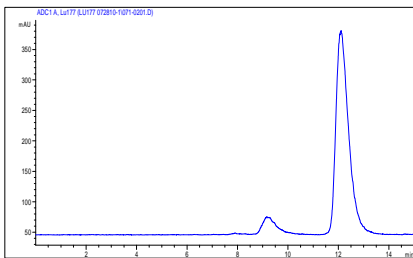

17.8%

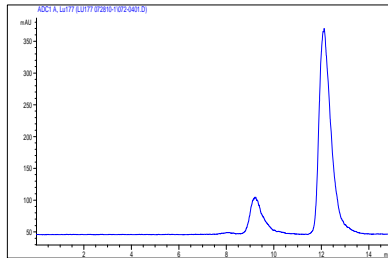

21.7%

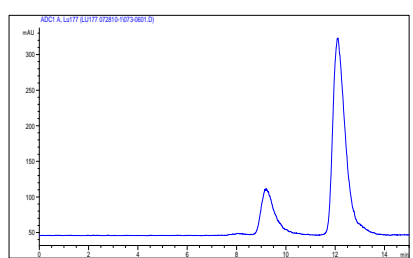

**20 min**

30.8%

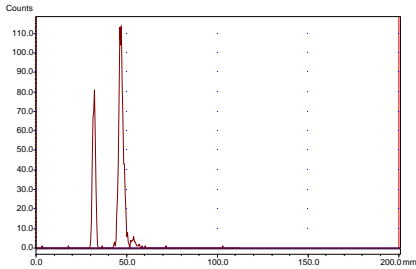

**30 min**

32.4%

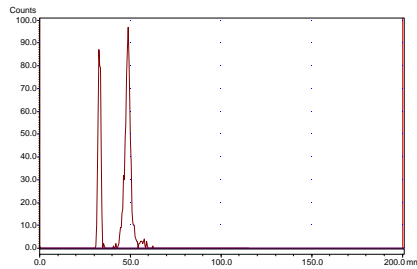

**60 min**

38.4%

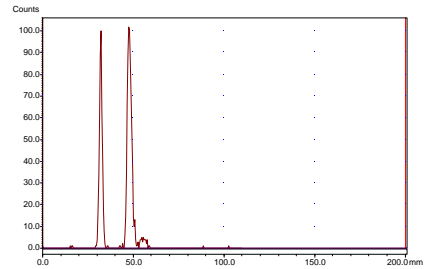

25.1%

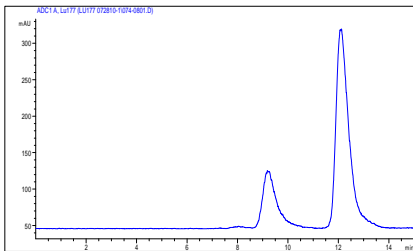

26.2%

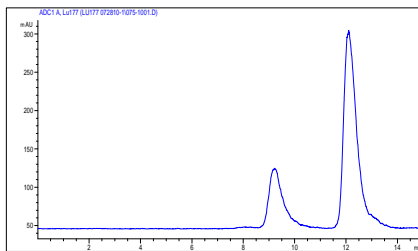

28.8%

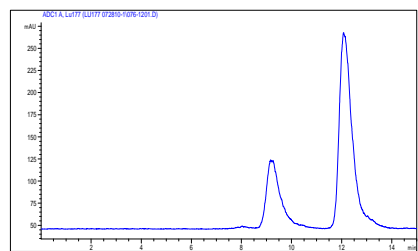

## C. Radiolabeling of C-NOTA-Trastuzumab with $^{90}\text{Y}$ .

### Sample 1

**1 min**  
3.0%

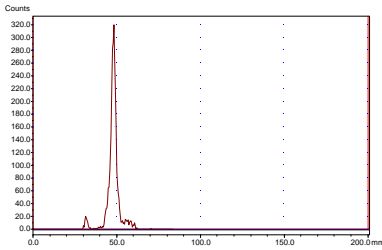

**5 min**  
18.8%

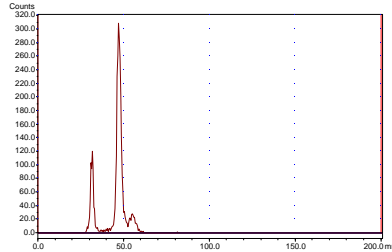

**10 min**  
6.7%

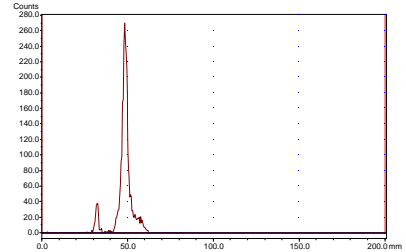

**20 min**  
8.6%

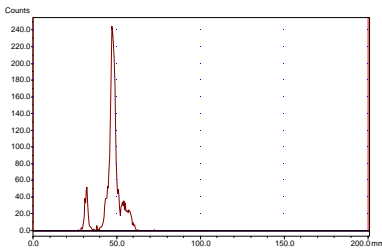

**30 min**  
10.7%

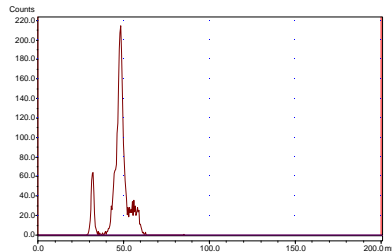

**60 min**  
12.2%

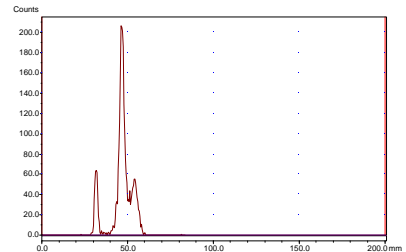

### Sample 2

**1 min**  
2.7%

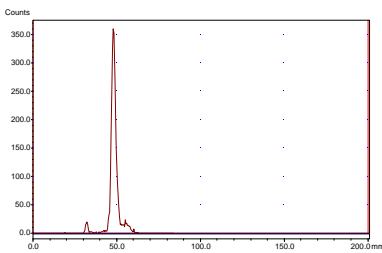

**5 min**  
7.2%

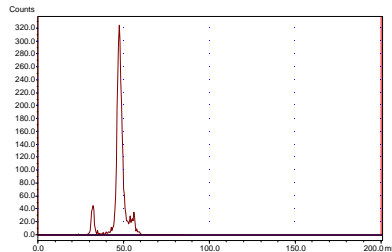

**10 min**  
13.5%

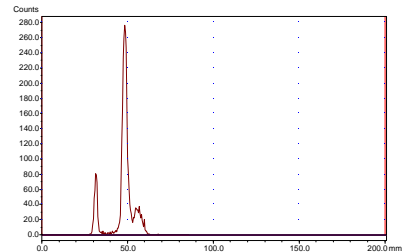

**20 min**  
8.6%

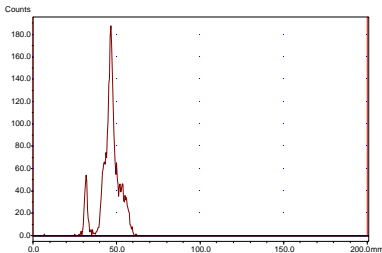

**30 min**  
6.7%

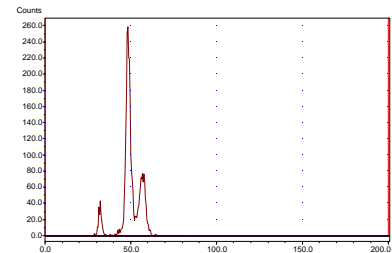

**60 min**  
19.9%

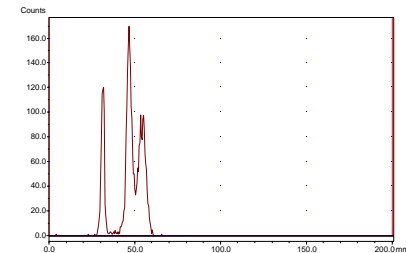



## D. Radiolabeling of C-NOTA-Trastuzumab with $^{177}\text{Lu}$

### Sample 1

**1 min**  
0.93%

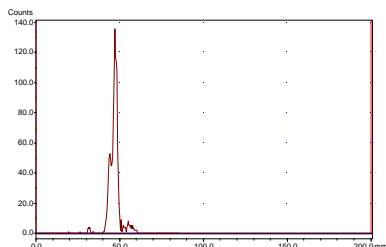

**5 min**  
2.5%

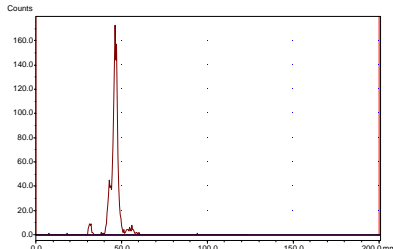

**10 min**  
3.7%

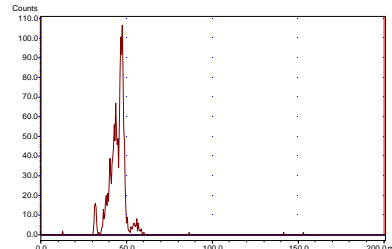

**20 min**  
8.3%

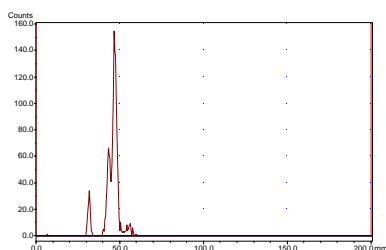

**30 min**  
12.5%

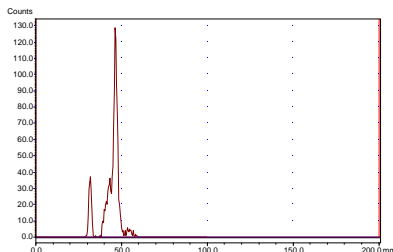

**60 min**  
19.7%

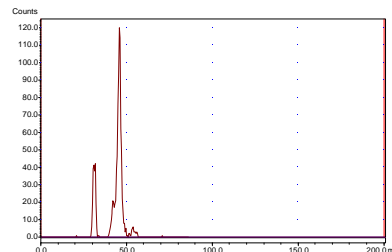

### Sample 2

**1 min**  
1.2%

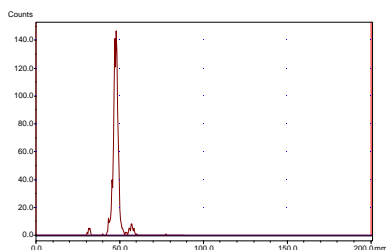

**5 min**  
4.8%

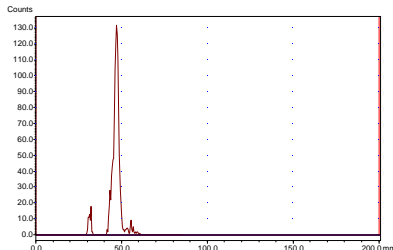

**10 min**  
6.3%

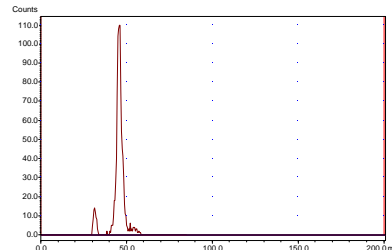

**20 min**  
11.3%

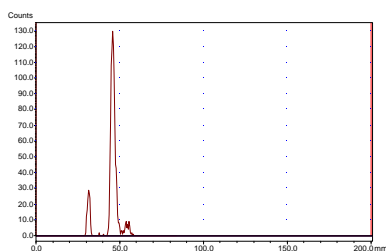

**30 min**  
14.1%

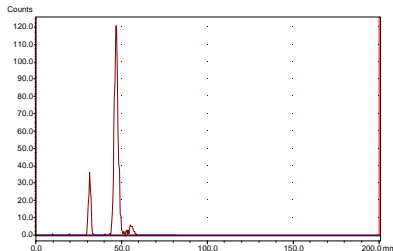

**60 min**  
26.0%

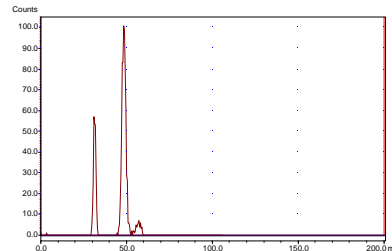

Supplement: NIHMS430895-supplement-Supporting_Information.pdf [file NIHMS430895-supplement-Supporting_Information.pdf]
